# Supplementary material
Source: PubMed Central journal article supplement (PMC4686209)
Supplement: JB.00520-15_zjb999093800so1.pdf [file JB.00520-15_zjb999093800so1.pdf]

## SUPPLEMENTAL MATERIALS

### Genome-based comparison of c-di-GMP signaling in pathogenic and commensal *Escherichia coli* strains

Tatyana L. Povolotsky and Regine Hengge\*

Institut für Biologie / Mikrobiologie, Humboldt-Universität zu Berlin, 10115 Berlin, Germany

#### CONTENTS

**Table S1.** *E. coli* strains analyzed in this study.

**Table S2.** Physiological functions, sensory domains and conserved motifs of the 35 GGDEF/EAL domain proteins found in 61 *E. coli* strains.

**Figure S1.** Alignment of nine MASE4-GGDEF proteins from *E. coli*, *Klebsiella pneumoniae* and *Enterobacter lignolyticus*.

**Table S1.** *E. coli* strains analyzed in this study.

| Pathotype                                             | Strain Name/Serotype                | GI Number |
|-------------------------------------------------------|-------------------------------------|-----------|
| <b>Pathogenic <i>E. coli</i> (enteric)</b>            |                                     |           |
| EAEC                                                  | 042 (O44:H18)                       | 387605479 |
|                                                       | 55989 (O104:H4)                     | 218693476 |
|                                                       | 01-09591 (HUSEC41) (O104:H4)        | 417836893 |
|                                                       | LB226692 (O104:H4)                  | 417809159 |
|                                                       | 2009EL-2050 (O104:H4)               | 410480139 |
|                                                       | 2009EL-2071 (O104:H4)               | 407466711 |
|                                                       | 2011C-3493 (O104:H4)                | 407479587 |
| ETEC                                                  | E24377A (O139:H28)                  | 157154711 |
|                                                       | ETEC H10407 (O7:H104)               | 387610477 |
| EHEC                                                  | 12009 (O103:H2)                     | 260842239 |
|                                                       | EC4115 (O157:H7)                    | 209395693 |
|                                                       | EDL933 (O157:H7)                    | 749302083 |
|                                                       | Sakai (O157:H7)                     | 15829254  |
|                                                       | TW14359 (O157:H7)                   | 254791136 |
|                                                       | Xuzhou21 (O157:H7)                  | 387880559 |
|                                                       | 11368 (O26:H1)                      | 260853213 |
| STEC                                                  | 11128 (O111:H-)                     | 260866153 |
|                                                       | RM13516 (O145:H28)                  | 749302049 |
|                                                       | RM13514 (O145:H28)                  | 749302203 |
|                                                       | RM12761 (O145:H28)                  | 749304472 |
|                                                       | RM12581 (O145:H28)                  | 749302183 |
|                                                       | JJ1886 (Subclone of ST131) (O25:H4) | 556550243 |
| EPEC                                                  | E2348/69 (O127:H6)                  | 215485161 |
|                                                       | CB9615 (O55:H7)                     | 291280824 |
|                                                       | RM12579 (O55:H7)                    | 387504934 |
| AIEC                                                  | LF82 (O83:H1)                       | 222154829 |
|                                                       | UM146                               | 386602643 |
|                                                       | NRG 857C (O83:H1)                   | 387615344 |
| <b>Pathogenic <i>E. coli</i> (extraintestinal)</b>    |                                     |           |
| NMEC                                                  | CE10 (O7:K1)                        | 386622414 |
|                                                       | IHE3034 (O18:K1:H7)                 | 386597751 |
|                                                       | S88 (O45:K1:H7)                     | 218556939 |
| ExPEC                                                 | IAI39 (O7:K1)                       | 218698419 |
|                                                       | PMV-1 (O18:K1)                      | 693169392 |
|                                                       | UMN026 (O7:K1:H18)                  | 218703261 |
| UPEC                                                  | 536 (O6:K15:H31)                    | 110640213 |
|                                                       | CFT073 (O6:K2:H1)                   | 26245917  |
|                                                       | UTI89 (O18:K1:H7)                   | 91209055  |
| <b><i>E. coli</i> isolated outside the human host</b> |                                     |           |
| Environmental Isolate                                 | SMS-3-5 (O19:H34)                   | 170679574 |

|                                 |                                     |           |
|---------------------------------|-------------------------------------|-----------|
| APEC                            | APEC O1 (O1:K1:H7)                  | 117622295 |
|                                 | APEC O78 (O78:H19)                  | 443615330 |
| Porcine ETEC                    | UMNF18 (O147)                       | 418300889 |
|                                 | UMNK88 (O149)                       | 386612163 |
| <b>Commensal <i>E. coli</i></b> |                                     |           |
|                                 | ABU 83972 (probiotic)<br>(OR:K5:H2) | 386637352 |
|                                 | ATCC 8739 (O146)                    | 170018061 |
|                                 | B str. REL606 (O7)                  | 254160123 |
|                                 | BL21(DE3) (O7)                      | 387825439 |
|                                 | 'BL21-Gold(DE3)pLysS AG' (O7)       | 253771435 |
|                                 | BW2952 (K-12 derivative) (O16)      | 238899406 |
|                                 | DH1 (K-12 derivative) (O16)         | 386593590 |
|                                 | ED1a (O81)                          | 218687878 |
|                                 | HS (O9)                             | 157159467 |
|                                 | IA11 (O8)                           | 218552585 |
|                                 | KO11FL (O6:K-:H49)                  | 378710836 |
|                                 | Nissle 1917 (probiotic) (O6:K5:H1)  | 749302377 |
|                                 | SE11 (O152:H28)                     | 209917191 |
|                                 | SE15 (O150:H5)                      | 387828053 |
|                                 | W (O6:K-:H49)                       | 386707734 |
|                                 | K-12 substr. DH10B (O16)            | 170079663 |
|                                 | K-12 substr. MDS42 (O16)            | 471332236 |
|                                 | K-12 substr. MG1655 (O16)           | 749204315 |
|                                 | K-12 substr. W3110 (O16)            | 388476123 |

**Table S2.** Physiological functions, sensory domains and conserved motifs of the 35 GGDEF/EAL domain proteins found in 61 *E. coli* strains.

| Name                                             | Physiological function                                                | Number of TMSs | Sensory Domains                         | GGDEF Domain   |                     | EAL Domain |                  |                 |                          |
|--------------------------------------------------|-----------------------------------------------------------------------|----------------|-----------------------------------------|----------------|---------------------|------------|------------------|-----------------|--------------------------|
|                                                  |                                                                       |                |                                         | I-Site<br>RxxD | A-Site<br>GG[D/E]EF | EALxR      | C-di-GMP binding | Catalysis       | Mg <sup>2+</sup> binding |
| <b>I. Diguanylate cyclases</b>                   |                                                                       |                |                                         |                |                     |            |                  |                 |                          |
| <b>DgcC (YaiC)</b>                               | Cellulose synthesis                                                   | 6              | MASE2                                   | RGSDVIGRFGGDEF |                     |            |                  |                 |                          |
| <b>DgcE (YegE)</b>                               | Downregulates motility, activates <i>csgD</i> transcription           | 10             | MASE1, PAS, PAS, PAS,                   | RSSDVLARLGGDEF | EARNL               | -/-/-      | -/-              |                 |                          |
| <b>DgcF (YneF)</b>                               | Unknown                                                               | 8              | xMASE1                                  | GDKGLVARMGGEEF |                     |            |                  |                 |                          |
| <b>DgcI (YliF)</b>                               | Unknown                                                               | 2              | GAPES2                                  | VDKGKVYRFGGDEF |                     |            |                  |                 |                          |
| <b>DgcJ (YeaJ)</b>                               | Downregulates motility                                                | 2              | GAPES1                                  | RKSDYAIRLGGDEF |                     |            |                  |                 |                          |
| <b>DgcM (YdaM)</b>                               | Co-activator for MlrA in <i>csgD</i> transcription                    | 0              | PAS, sensory box AtoS, PAS <sub>2</sub> | RKGDVFRWGGEF   |                     |            |                  |                 |                          |
| <b>DgcN (YfiN)</b>                               | Unknown                                                               | 2              | CHASE8, HAMP                            | GLRHKAYRLGGDEF |                     |            |                  |                 |                          |
| <b>DgcO (DosC, YddV)</b>                         | Regulates PNPase activity                                             | 0              | Sensor globin                           | RSSDYVFRYGGDEF |                     |            |                  |                 |                          |
| <b>DgcP (YeaP)</b>                               | Unknown                                                               | 0              | GAF                                     | QNGEVIGRLGGDEF |                     |            |                  |                 |                          |
| <b>DgcQ (YedQ)</b>                               | Cellulose synthesis                                                   | 2              | CHASE7                                  | RAQDVAGRVGGEEF |                     |            |                  |                 |                          |
| <b>DgcT (YcdT)</b>                               | Regulates PGA production                                              | 8              | MASE4                                   | RPDDLARVGGEEF  |                     |            |                  |                 |                          |
| <b>DgcZ (YdeH)</b>                               | Regulates PGA production                                              | 0              | CZB                                     | RDYETVYRYGGEEF |                     |            |                  |                 |                          |
| <b>DgcX</b>                                      | Unknown                                                               | 8              | MASE4                                   | RKEDILGRLGGEEF |                     |            |                  |                 |                          |
| <b>DgcY</b>                                      | Unknown                                                               | 6              | MASE5                                   | QSEDVVVRYGGEEF |                     |            |                  |                 |                          |
| <b>II. c-di-GMP-specific phosphodiesterases</b>  |                                                                       |                |                                         |                |                     |            |                  |                 |                          |
| <b>PdeA (YfeA)</b>                               | Unknown                                                               | 8              | MASE1,                                  | QENEKLYQLPGSEL | EILAR               | Q/R/D/D    | T/E              | E/N/E/E/D/K/E/Q |                          |
| <b>PdeB (YlaB)</b>                               | Unknown                                                               | 2              | CSS                                     |                | EALAR               | Q/R/D/D    | T/E              | E/N/E/E/D/K/E/Q |                          |
| <b>PdeC (YjcC)</b>                               | Unknown                                                               | 2              | CSS                                     |                | EALLR               | Q/R/D/D    | T/E              | E/N/E/E/D/K/E/Q |                          |
| <b>PdeD (YoaD)</b>                               | Unknown                                                               | 2              | CSS                                     |                | EILLR               | Q/R/D/D    | T/E              | E/N/E/E/D/K/E/Q |                          |
| <b>PdeF (YfgF)</b>                               | Unknown                                                               | 9              | MASE1,                                  | EPGEDVYQLSGNDL | EILLR               | Q/R/D/D    | T/E              | E/N/E/E/D/K/E/Q |                          |
| <b>PdeG (YegG)</b>                               | Unknown                                                               | 2              | CSS                                     |                | EVLAR               | Q/R/D/D    | T/E              | E/N/E/E/D/K/E/Q |                          |
| <b>PdeH (YhjH)</b>                               | Promotes motility                                                     | 0              |                                         |                | ELTV                | Q/V/D/A    | L/E              | E/N/P/R/D/K/E/Q |                          |
| <b>PdeI (YliE)</b>                               | Unknown                                                               | 2              |                                         |                | EALCR               | Q/R/D/D    | T/E              | E/N/E/E/D/K/E/Q |                          |
| <b>PdeK (YhjK)</b>                               | Unknown                                                               | 2              | GAPES3, HAMP                            | SPRMILAQISGYDF | EVLLR               | Q/R/D/D    | T/E              | E/N/E/E/D/K/E/Q |                          |
| <b>PdeL (YahA)</b>                               | Unknown                                                               | 0              | LuxR                                    |                | EALVR               | Q/R/D/D    | T/E              | E/N/E/E/D/K/E/Q |                          |
| <b>PdeN (Rtn)</b>                                | Unknown                                                               | 2              | CSS                                     |                | EVLLR               | Q/R/D/D    | T/E              | E/N/E/E/D/K/E/Q |                          |
| <b>PdeO (DosP, YddU)</b>                         | Regulates PNPase activity                                             | 0              | PAS, PAS, xGAF                          | KPDQYLCRIEQTQF | EALAR               | Q/R/D/D    | T/E              | E/N/E/E/D/K/E/Q |                          |
| <b>PdeR (YciR)</b>                               | Inhibits YdaM and MlrA and thereby <i>csgD</i> transcription          | 0              | PAS                                     | EHDQVLARPGGDEF | EALVR               | Q/R/D/D    | T/E              | E/N/E/E/D/K/E/Q |                          |
| <b>PdeT (VmpA)</b>                               | Promotes motility                                                     | 2              | CSS                                     |                | EALMR               | Q/R/D/D    | T/S              | E/N/E/E/D/K/E/Q |                          |
| <b>PdeW</b>                                      | Unknown                                                               | 0              |                                         |                | ELLSR               | E/R/D/D    | S/E              | E/L/E/E/D/K/E/Q |                          |
| <b>PdeX</b>                                      | Unknown                                                               | 0              |                                         |                | ELLVR               | Q/R/D/D    | T/E              | E/N/E/E/D/K/E/Q |                          |
| <b>PdeY (SfaY)</b>                               | Unknown                                                               | 0              |                                         |                | EMLSD               | E/D/D/S    | S/E              | E/N/E/E/D/K/E/Q |                          |
| <b>III. Degenerate GGDEF/EAL domain proteins</b> |                                                                       |                |                                         |                |                     |            |                  |                 |                          |
| <b>BluF (YcgF)</b>                               | Blue light-controlled direct antagonist for the BluR (YcgE) repressor | 0              | BLUF                                    |                | EAIVQ               | N/Q/H/S    | T/A              | E/N/E/E/D/K/M/Q |                          |
| <b>CdgI (YeaI)</b>                               | Unknown                                                               | 8              | MASE4                                   | RPDDLARLEGEVF  |                     |            |                  |                 |                          |
| <b>CsrD (YhdA)</b>                               | Turnover of RNAs CsrB/CsrC                                            | 2              | GAPES4                                  | YPGALLARYHRSDF | ELMCR               | Q/R/Q/H    | A/R              | E/E/E/E/N/K/E/Q |                          |
| <b>RflP (YdiV)</b>                               | Inhibitor and proteolytic targeting factor for FlhDC                  | 0              |                                         |                | EVLxR               | F/H/N/D    | N/D              | E/-/L/E/G/M/G/Q |                          |



|    |           |     |               |                                                       |     |
|----|-----------|-----|---------------|-------------------------------------------------------|-----|
| gi | 253773261 | ref | YP_003036092. | YVVDYCPDNHTATWGINYTKILVCLWAFLLFFIIMRTRLASELWPLIALL    | 273 |
| gi | 311280103 | ref | YP_003942334. | TIYYHTGSKSQMVMGVVYLLLALWALCLLLIIRYRKLHDDMWRISITVL     | 225 |
| gi | 253324989 | gb  | ACT29591.1    | HIAELTNEGQVWVKASYVTIMIFMWLTLSSVNLVFNGLRYDIWNGVTVI     | 227 |
| gi | 157155149 | ref | YP_001461960. | NI IQYSLNRHLPWNIVYTKIISVFWLVLLISSCISIRNYSKIWLICII LI  | 228 |
| gi | 238895023 | ref | YP_002919757. | NFIDDLSHFTTFLWQSIIGWLLMAVWFITLILLISLSKLRNIFWFSGAF     | 265 |
| gi | 152970532 | ref | YP_001335641. | NFIDDLSHFTTFLWQSIIGWLLMAVWFITLILLISLSKLRNIFWFSGAF     | 167 |
| gi | 311279495 | ref | YP_003941726. | AFIDNMTLAFTPLWQKATGGLLITMWLVTLIAMLIIITRLRNIFWFSGCF    | 229 |
| gi | 146311462 | ref | YP_001176536. | DLINNTTRQFTALWQIINGALIILWLIALTLLIITRLRNLFWASGTFL      | 228 |
| gi | 311278699 | ref | YP_003940930. | DLTHQKISDFPFWR---PGVMFVAWCVLLIIAIIITTRFRNMWYTGIIYFV   | 232 |
|    |           |     |               | . * * * * *                                           |     |
| gi | 253773261 | ref | YP_003036092. | CLASLCCNLLLLTLDEYNYTIWYISRGIEVSSKLFVVSFLIYNIFQELQL    | 323 |
| gi | 311280103 | ref | YP_003942334. | CLSGFCCNLLLIALRLYDLSIWIICRMLEAISKMCIIITLMYSIFHTLNN    | 275 |
| gi | 253324989 | gb  | ACT29591.1    | AFCVAVLYNISLLEFMSRYSVSTWYISRTIEVSVSKLTVMVIFMCHIFSALRV | 277 |
| gi | 157155149 | ref | YP_001461960. | SIVSVCCNLLILLYFIDKSHPAWMTKFLLELSMIYIISITLMYYVFRKLNH   | 278 |
| gi | 238895023 | ref | YP_002919757. | CSAYLFTLFQLLSTAGELDQTYQARFFETLCTFLFLLVLLVDFVILYRE     | 315 |
| gi | 152970532 | ref | YP_001335641. | CSAYLFTLFQLLSTAGELDQTYQARFFETLCTFLFLLVLLVDFVILYRE     | 217 |
| gi | 311279495 | ref | YP_003941726. | CVFYIFTLLTILLSPVGESNNWYQARMFETIATLFLIFVLLGDVFTLYKD    | 279 |
| gi | 146311462 | ref | YP_001176536. | CTCYVILITLLPADFIGGSVWY SARLFE TTASLLIILLLHDVFSLYRN    | 278 |
| gi | 311278699 | ref | YP_003940930. | CISYMLMSFQLITSEYSTDNMLYRTRMLEVLSTLVFVFLFINSFIIYKN     | 282 |
|    |           |     |               | . * * * * *                                           |     |
| gi | 253773261 | ref | YP_003036092. | SS-----KLAVDHDLTNIYNRRYFFNSVESLSSRP-VVKDFCVMLVDI      | 365 |
| gi | 311280103 | ref | YP_003942334. | IS-----EKAFHDPLTAIYNRRFFFFEFDRFLQEW-NFTPYCAMIVDI      | 317 |
| gi | 253324989 | gb  | ACT29591.1    | TK-----NIAHRDPLTNIFNRRYFFNELTVQSASA-QKTPYCVMI         | 319 |
| gi | 157155149 | ref | YP_001461960. | AN-----HMAIHDPLTNTYNRRYFIDSLKNIS----KHHDFSVIMLDI      | 317 |
| gi | 238895023 | ref | YP_002919757. | SNHKYVHSYQNSIRDPLRLYNRSFFFYDTLNQQLAKVNAQHPLSVLISDL    | 365 |
| gi | 152970532 | ref | YP_001335641. | SNHKYVHSYQNSIRDPLRLYNRSFFFYDTLNQQLAKVNAQHPLSVLISDL    | 267 |
| gi | 311279495 | ref | YP_003941726. | SNNKYQNSYQNSIRDPMYQLYNRSYFYDSLQTQTARVTPQPPASVIVCDL    | 329 |
| gi | 146311462 | ref | YP_001176536. | SHIKYQQSYQNSIRDALRLYNRSYFYESLNQALGKITDHPVSVIVCDL      | 328 |
| gi | 311278699 | ref | YP_003940930. | SNTKYKNAYQNSIRDHLTMLYNRRYFYDALMKLIPCITVKNPLSIVCDI     | 332 |
|    |           |     |               | . * * * * *                                           |     |
| gi | 253773261 | ref | YP_003036092. | NQFKRINAQWGHVGDQKVLVSVIVDIIQQSIRPDIILARLEGEVIGLLFTE   | 415 |
| gi | 311280103 | ref | YP_003942334. | DRFKRINDRYGHEVGDQKTLIAVARIADTLRNEILFARIGGEEFGILSON    | 367 |
| gi | 253324989 | gb  | ACT29591.1    | DHFVKVNDTWGHPVGDQVIKTVVNIIGKSIRPDIILARVGGEEFGVLLTD    | 369 |
| gi | 157155149 | ref | YP_001461960. | DSFKSINDKWGHMGDQVIVMVTRIIKKSIRKEIILGRLGGEEFGIIKIG     | 367 |
| gi | 238895023 | ref | YP_002919757. | DHFKRINDSYGHVAGDKVIQFAASVLESLSRVDAAARIGGEEFALLLVN     | 415 |
| gi | 152970532 | ref | YP_001335641. | DHFKRINDSYGHVAGDKVIQFAASVLESLSRVDAAARIGGEEFALLLVN     | 317 |
| gi | 311279495 | ref | YP_003941726. | DHFKRINDSYGHLQGDQKVIQFVASILQDSVRENDAARIGGEEFALLLVN    | 379 |
| gi | 146311462 | ref | YP_001176536. | DYFKRINDNYGHLQGDQKVIQFVANLLMDSVRRPQITARIGGEEFVLLLSN   | 378 |
| gi | 311278699 | ref | YP_003940930. | DFFKSINDKYGHQGDQKVIQFIAIKIQSLLRQNDILARIGGEEFALLLPG    | 382 |
|    |           |     |               | . * * * * *                                           |     |
| gi | 253773261 | ref | YP_003036092. | LNS-AQAKIIAERMRKNVELLTGFSNRYDVPEQMTISIGTVFSTGDTRNI    | 464 |
| gi | 311280103 | ref | YP_003942334. | INNREMAKNAIEKIRINIERNTSIDGYNLPESMTVCIGVYFSTPIKHTS     | 417 |
| gi | 253324989 | gb  | ACT29591.1    | IDT-ERAKALAERIRENVERLTGDNPEYAIPOKVTISIGAVVTQENALNP    | 418 |
| gi | 157155149 | ref | YP_001461960. | NTQ-KLLLSIAERIRKNIEEQCSEKLLSHGPEKITVTSIGCFTSKENNLSP   | 416 |
| gi | 238895023 | ref | YP_002919757. | TGE-KEAQAI AERIRLAVSAGES-----HLPERMTISMGVYTTYDNSVTA   | 459 |
| gi | 152970532 | ref | YP_001335641. | TGE-KEAQAI AERIRLAVSAGES-----HLPERMTISMGVYTTYDNSVTA   | 361 |
| gi | 311279495 | ref | YP_003941726. | TSS-EEAYRVAERIRLIISEHDAQSSSGSFPEKITISMGVFTTTSAGLV     | 428 |
| gi | 146311462 | ref | YP_001176536. | THS-EAARLVAERIRLSLSSFDRTITTEGMLPESVTISMGIYTATPLPVT    | 427 |
| gi | 311278699 | ref | YP_003940930. | VNE-ENAKIIAERIRCHAVSQHDSKNTDIHQSERITISMGIYSATDNTMTE   | 431 |
|    |           |     |               | . * * * * *                                           |     |
| gi | 253773261 | ref | YP_003036092. | SLVMTEADKALREAKSEGGNKVI IHII-----                     | 491 |
| gi | 311280103 | ref | YP_003942334. | SEAMRLADIALYQAKNSGRNKVIVYEPSFDAPPARGEEH-----          | 457 |
| gi | 253324989 | gb  | ACT29591.1    | NEIYRLADNALYEAKETGRNKVVVRDVVNFCESP-----               | 452 |
| gi | 157155149 | ref | YP_001461960. | SEMLVNADKALYQAKRTGKNKVI IHSK-----                     | 443 |
| gi | 238895023 | ref | YP_002919757. | EACVQRAD EAMYEAKNNGRNQVIVWHQGG-----                   | 489 |
| gi | 152970532 | ref | YP_001335641. | EACVQRAD EAMYEAKNNGRNQVIVWHQGG-----                   | 391 |
| gi | 311279495 | ref | YP_003941726. | EVCVQRAD EAMYEAKENGRNRVVTWQPER-----                   | 457 |
| gi | 146311462 | ref | YP_001176536. | EECVERADKAMY EAKETGRNRVVVYQENKALRGKAFHDVSRGFATR       | 473 |
| gi | 311278699 | ref | YP_003940930. | DVYISRADDAMYKAKHAGRNVCVWVQO-----                      | 458 |
|    |           |     |               | . * * * * *                                           |     |
